# Supplementary material for: Chemical, Antioxidant, and Antimicrobial Properties of the Peel and Male Flower By-Products of Four Varieties of Punica granatum L. Cultivated in the Marche Region for Their Use in Cosmetic Products
Source: MDPI journal article supplement (doi:10.3390/antiox11040768), 2022-04-12
Supplement: s1 [file s1]

## Supplementary Material

# Chemical, antioxidant, and antimicrobial properties of the peel and male flowers by-products of four varieties of *Punica granatum* L. cultivated in the Marche region given their exploitation in cosmetic products

### Summary of Tables

**Table S1. Identification of polyphenols in pomegranate by-product extracts by UPLC-ESI-MS/MS analysis.**

**Table S2. Identification of anthocyanins in pomegranate by-products extracts by UPLC-ESI-MS/MS analysis.**

### Polyphenols identification

The first large group of hydrosysable tannins identified in our work contains three main subclasses of compound: gallotannins and ellagitannins belonging to the phenol groups that are esterified to the hydroxyl groups of glucose: gallic acid in gallotannins and hexahydroxydiphenic acid (HHDP) in ellagitannins [1] and gallagyl esters.

Compound **C1** and **C2** belonging to the classes of gallotannins showing a  $[M-H]^-$  ions at  $m/z$  331 and 483, respectively. **C1** reports a fragment ions in  $MS^2$  at  $m/z$  169 related to the loss of hexose fraction (162Da) and a fragment at  $m/z$  125 which is typical for the fragmentation of gallic acid  $[M-H-162\text{ Da}-44\text{ Da}]$ . According to the literature **C1** was assigned to galloyl-hexoside, while **C2** was identified as digalloyl-hexoside according to its precursor ion at  $m/z$  483 [2, 3].

Among hydrolysable tannins, ellagitannins compounds from **C3** to **C18** were identified. For this class of compound, characteristic fragments ions were identified as  $m/z$  301 and attributed to the aglycone of ellagic acid that was obtained after a spontaneous-lactonization of the HHDP residue (**C16**) [3]. So, **C16** was identified as ellagic acid showing a typical signal at  $m/z$  301 and characteristic fragment ions at  $m/z$  229 (corresponding to the loss of four  $H_2O$  molecules) and  $m/z$  185 (corresponding to a loss of  $CO_2$ ).

**C3** at 2.3 min. produced a molecular ion at  $m/z$  481  $[M-H]^-$  and was identified as HHDP-hex [3-5]. The ellagic acid hexoside moiety was also detected in the compounds **C4**, **C11**, **C12**, **C13**. **C4** showed an  $[M-H]^-$  ion at  $m/z$  633 and fragments at  $m/z$  301 and 169 which are typical for the loss of ellagic acid and the galloyl moiety. **C11** showed an  $[M-H]^-$  ion at  $m/z$  935 and a typical fragments at  $m/z$  633 and 301 and was identified as galloyl-bis-HHDP-hexoside (casuaricitin) [3]. **C12** showed an  $[M-H]^-$  ion at  $m/z$  463 and typical fragments at  $m/z$  301 indicated the loss of hexoside and was identified as ellagic acid hex[3, 4]. **C13** exhibited an  $[M-H]^-$  ion at  $m/z$  951 producing fragments at  $m/z$  933 and at  $m/z$  301 (ellagic acid) in the  $MS^2$  experiment. This fragment ( $m/z$  933), generating fragments at  $m/z$  915 from the loss of water, is typical for castalagin/vescalagin or galloyl-gallagyl-hexoside (galloylpunicalin, pedunculagin III) as already reported in literature [3, 5]. **C9** produced an  $[M-H]^-$  ion at  $m/z$  799 and fragments at  $m/z$  479 (loss of ellagic acid), fragments at  $m/z$  301 (ellagic acid). Furthermore, the established fragments of ellagic acid were confirmed. This compound may be attributed to granatin A (HHDP-DHHDP-hexoside). **C6** ( $m/z$  1415) and **C15** ( $m/z$  433) produced fragments at  $m/z$  933 and at  $m/z$  301 (ellagic acid) in the  $MS^2$  experiment, respectively. **C6** was identified as di(HHDP-galloyl)glucose-pentose[6]. **C15** was assigned to an ellagic acid-pentoside that

in the MS2 experiment, the ion at  $m/z$  301 was generated by the loss of 132 Da, reasonably assigned as the elimination of pentose. In addition, ellagitannins with a gluconic acid core were also found in pomegranates. Among these, **C5** was identified as galloyl-HHDP-gluconic acid. Its  $[M-H]^-$  ion at  $m/z$  649 showed fragments at  $m/z$  497 and 301, resulting from the loss of gallic acid (releasing HHDP-gluconic acid) and ellagic acid, respectively. Galloyl-HHDP-gluconic acid ( $m/z$  649) also formed part of **C10** exhibiting an  $[M-H]^-$  ion at  $m/z$  801. Further fragments at  $m/z$  348 and 497 resulted from the loss of ellagic acid and gallic acid. This compound was identified as digalloyl-HHDP-gluconic acid (punigluconin). Compound **C7** exhibited an  $[M-H]^-$  ion at  $m/z$  783. The loss of ellagic acid in the MS2 experiment produced fragments at  $m/z$  481 and the fragment at  $m/z$  301 of ellagic acid. Based on this fragmentation pathway compound **C7** was identified as bis-HHDP-hexoside (pedunculagin I). **C8** was characterised as digalloyl-HHDP-hexoside (pedunculagin II). This assignment is based on its  $[M-H]^-$  ion at  $m/z$  785 and the release of typical ellagitannin and gallotannin fragments at  $m/z$  301 (ellagic acid) and 169 (galloyl group). Each of the two different retention times corresponded to an isomeric structure, also differing in their fragmentation patterns. The  $[M-H]^-$  ion of **C15** was obtained at  $m/z$  433. In the MS2 experiment, the ion at  $m/z$  301 was generated by the loss of 132 Da, reasonably assigned as the elimination of pentose. The occurrence of the ion at  $m/z$  300 was attributed to a homolytic rupture of the glycosidic bond [5]. In addition to ellagic acid pentoside, further monoglycosylated ellagic acid derivatives were observed as an ellagic acid deoxyhexoside ( $m/z$  447; **C14**) and an ellagic acid derivate (der) ( $m/z$  441; **C17**) all of them showing the typical fragments of ellagic acid ( $m/z$  301). An  $[M-H]^-$  ion at  $m/z$  469 was observed for the isomeric compound **C18**, producing fragment ions at  $m/z$  425 indicating the loss of a carboxyl group and typical fragments of ellagic acid. Compound **C18** was therefore assigned to the valoneic acid bilactone [3]. **C19** eluted at 4.0 min with a precursor ion at  $m/z$  781 and a fragment at  $m/z$  601 (gallagyl residue) were identified as gallagyl-hexoside (punicalin). Identification of punicalagin was based on its MS spectrum which showed an exact  $[M-H]^-$  ion at  $m/z$  1083. Punicalagin  $\alpha$  and  $\beta$  eluted in peaks **C20** (9.2 min) and **21** (11.7 min). MS spectra of both isomers showed a  $[M-H]^-$  ion at  $m/z$  1083, which fragmented at  $m/z$  781 and  $m/z$  601 (corresponding to the loss of ellagic acid and gallagic acid moiety, respectively). The 781  $m/z$  peak **C 19** corresponded to the punicalin  $[M-H]^-$  ion and a 302  $m/z$  peak to the ellagic acid  $[M-H]^-$  ion [7]. Gallic acid (**C22**) is a signal at  $m/z$  169 and showed a typical fragment at  $m/z$  125 corresponding to the loss of CO<sub>2</sub>. **C23** showed a signal at  $m/z$  355 and fragment ions at  $m/z$  193,175,217 and 236. This compound was identified as ferulic acid hex due to its fragmentation revealed the formation of an aglycone fragment at  $m/z$  193 (ferulic acid) and fragments at  $m/z$  175 from the loss of water. **C24** was identified as dihydrokaempferol-hex and produced an ion at  $m/z$  449 and a fragments at  $m/z$  287 (loss of hexose moiety), 259 and 269 (loss of water). Among the class of gallotechnin compounds **25** and **26** were identified as gallocatechin and catechin-galocatechin, respectively. **C25** showed a ion at  $m/z$  306 producing a fragments at  $m/z$  125,137,165 and 219, while **C26** ( $m/z$ 593) showed fragments at  $m/z$  441,305,423 and 137 suggesting that the component of aglycone in these compounds was either catechin (290 Da) or epicatechin [2]. Compounds **C30** and **C31** showed an ion at  $m/z$  447 reporting the same fragment ions at  $m/z$  285 in the MS2 experiment. In case of **C30** were also detect the fragments ions at  $m/z$  255 and 227 already detected for the astralagin[2]. The **C31** were identified as luteolin-glucoside reporting a in its MS2 experiment, the fragment ions at  $m/z$  285 which led to the identification of the aglycone as lutelolin [2]. **C29** (rt = 24.1 min) exhibited a  $[M-H]^-$  ion at  $m/z$  593. This compound was identified as kaempferol-7-orhamno-glucoside due to in the MS2 experiment showed the fragment ion at  $m/z$  285 and characteristic fragments at  $m/z$  255, 227 belonging to kaempferol [2]. **C28** exhibited  $[M-H]^-$  ions at  $m/z$  609 with fragments ions at  $m/z$  301 and 300 matched with the loss of rhamno-glucose (146 + 162 Da) and was identified as quercetin-3-O-rhamno-glucoside (rutin) [2]. We also revealed the presence of **C27** ( $m/z$  343, RT=1.54 min.) never found in pomegranate peel extracts, according to the literature. The identification of this compound will be further confirmed by HRMS analysis.

**Table S1.** Identification of polyphenols in pomegranate by-product extracts by UPLC-ESI-MS/MS analysis.

| Peak number                  | R.T.<br>(min.) | Precursor ion $m/z$<br>[M-H] <sup>-</sup> | MS <sup>2</sup> ion $m/z$ | Identification                      |
|------------------------------|----------------|-------------------------------------------|---------------------------|-------------------------------------|
| <b>Hydrolysable tannins</b>  |                |                                           |                           |                                     |
| Gallotannins                 |                |                                           |                           |                                     |
| C1                           | 2.6            | 331                                       | 125,169                   | Galloyl-hex                         |
| C2                           | 11.2           | 483                                       | 169,125,439               | Digalloyl-hex                       |
| Ellagitannins                |                |                                           |                           |                                     |
| C3                           | 2.3            | 481                                       | 301,275,257               | HHDP <sup>2</sup> -hex              |
| C4                           | 3.6            | 633                                       | 301, 275, 249, 169        | Galloyl-HHDP-hex                    |
| C5                           | 3.6            | 649                                       | 301, 497                  | Galloyl-HHDP-glucoside              |
| C6                           | 6.3            | 1415                                      | 633, 613, 783             | Di(HHDP-galloylglucose)-pent        |
| C7                           | 6.8            | 783                                       | 301, 481, 275             | Pedunculagina I                     |
| C8                           | 11.7           | 785                                       | 301, 275, 249, 169        | PedunculaginaII                     |
| C9                           | 12.9           | 799                                       | 479, 301, 247             | HHDP-DHHDP-hexoside Granatin A      |
| C10                          | 13.7           | 801                                       | 649, 348                  | Digalloyl-HHDP-gluc (Punigluconin)  |
| C11                          | 13.8           | 935                                       | 633, 275, 708, 301        | Galloyl-bis-HHDP-hex (Casuarinin)   |
| C12                          | 16.2           | 463                                       | 301, 300, 271, 255        | Ellagic acid-hex                    |
| C13                          | 19.3           | 951                                       | 301, 933, 273, 463        | Galloyl-HHDP-DHHDP-hex (Granatin B) |
| C14                          | 20.5           | 447                                       | 300, 301                  | Ellagic acid-deoxyhex               |
| C15                          | 20.7           | 433                                       | 300, 301                  | Ellagic acid-pent                   |
| C16                          | 21.8           | 301                                       | 145,185,229               | Ellagic acid                        |
| C17                          | 22.4           | 441                                       | 397, 398, 301             | Ellagic acid der                    |
| C18                          | 24.2           | 469                                       | 425, 301, 426             | Valoneic acid bilactone             |
| <b>Gallagyl esters</b>       |                |                                           |                           |                                     |
| C19                          | 4.0            | 781                                       | 601, 721                  | Punicalin                           |
| C20                          | 9.2            | 1083                                      | 601, 302, 781, 575        | Punicalagin                         |
| C21                          | 11.7           | 1083                                      | 601, 302, 781, 575        | Punicalagin                         |
| <b>Hydroxybenzoic acids</b>  |                |                                           |                           |                                     |
| C22                          | 3.8            | 169                                       | 125                       | Gallic acid                         |
| <b>Hydroxycinnamic acids</b> |                |                                           |                           |                                     |
| C23                          | 2.7            | 355                                       | 193, 175, 217, 236        | Ferulic acid-hex                    |
| <b>Dihydroflavonol</b>       |                |                                           |                           |                                     |
| C24                          | 16.4           | 449                                       | 287, 259, 269             | Dihydrokaempferol-hex               |
| <b>Gallotechnin</b>          |                |                                           |                           |                                     |
| C25                          | 6.8            | 306                                       | 125, 137, 165, 219        | Gallocatechin                       |
| C26                          | 7.0            | 593                                       | 441, 305, 423, 137        | Catechin-gallocatechin              |
| C27                          | 1.54           | 343                                       | 181, 149, 113, 119, 89,59 | Unknown                             |
| C28                          | 3.2            | 609                                       | 301, 300, 271             | Quercetin rutinoside                |
| C29                          | 24.1           | 593                                       | 285,255,227               | Kaempferol rutinoside               |
| C30                          | 25.4           | 447                                       | 255,227,285               | Astralagine                         |
| C31                          | 26.3           | 447                                       | 285                       | Luteolin-glucoside                  |

hex=hexoside; HHDP=hexahydroxydiphenoyl; pent=pentoside; der=derivate

The ESI source in positive ion mode was selected to detect anthocyanins extracted from pomegranate peel and male flowers extracts. MS and MS2 spectra of A1-A4 peaks showed

molecular ions characteristic of cyanidin ( $m/z$  287), pelargonidin ( $m/z$  271) confirmed by external standards. The anthocyanins revealed the typical mass spectrometric behavior in ESI(+)-experiments, i.e. they showed  $M^+$  experiments and the sequential loss of their saccharide moieties, releasing the aglycones in the  $MS^+$  ions.

**Table S2.** Identification of anthocyanins in pomegranate by-products extracts by UPLC-ESI-MS/MS analysis.

| Peak number | R.T.<br>(min.) | Precursor ion $m/z$<br>[M] <sup>+</sup> | $MS^2$ ion $m/z$ | Identification               |
|-------------|----------------|-----------------------------------------|------------------|------------------------------|
| A1          | 6.2            | 611                                     | 287, 449         | Cyanidin 3,5-diglucoside     |
| A3          | 8.4            | 595                                     | 433              | Pelargonidin 3,5-diglucoside |
| A2          | 10.3           | 449                                     | 487              | Cyanidin 3-glucoside         |
| A4          | 12             | 433                                     | 271              | Pelargonidin 3-glucoside     |

## References

1. Bar-Ya'akov Irit; Tian Li; Amir Rachel; Holland Doron, Primary Metabolites, Anthocyanins, and Hydrolyzable Tannins in the Pomegranate Fruit. **2019**, 10, (620).
2. Abdulla Rahima; Mansur Sanawar; Lai Haizhong; Ubul Ablikim; Sun Guangying; Huang Guozheng; Aisa Haji Akber, Qualitative Analysis of Polyphenols in Macroporous Resin Pretreated Pomegranate Husk Extract by HPLC-QTOF-MS. *Phytochemical Analysis* **2017**, 28, (5), 465-473.
3. Fischer Ulrike A.; Carle Reinhold; Kammerer Dietmar R., Identification and quantification of phenolic compounds from pomegranate (*Punica granatum* L.) peel, mesocarp, aril and differently produced juices by HPLC-DAD-ESI/MSn. *Food Chemistry* **2011**, 127, (2), 807-821.
4. Hernández-Corroto Ester; Marina M<sup>a</sup> Luisa; García M<sup>a</sup> Concepción, Extraction and identification by high resolution mass spectrometry of bioactive substances in different extracts obtained from pomegranate peel. *Journal of Chromatography A* **2019**, 1594, 82-92.
5. Abid Mouna; Yaich Hela; Cheikhrouhou Salma; Khemakhem Ibtihel; Bouaziz Mohamed; Attia Hamadi; Ayadi M. A., Antioxidant properties and phenolic profile characterization by LC-MS/MS of selected Tunisian pomegranate peels. *J Food Sci Technol* **2017**, 54, (9), 2890-2901.
6. Mena Pedro; Calani Luca; Dall; Asta Chiara; Galaverna Gianni; García-Viguera Cristina; Bruni Renato; Crozier Alan; Del Rio Daniele, Rapid and Comprehensive Evaluation of (Poly)phenolic Compounds in Pomegranate (*Punica granatum* L.) Juice by UHPLC-MSn. *Molecules* **2012**, 17, (12).
7. Gosset-Erard Clarisse; Zhao Minjie; Lordel-Madeleine Sonia; Ennahar Saïd, Identification of punicalagin as the bioactive compound behind the antimicrobial activity of pomegranate (*Punica granatum* L.) peels. *Food Chemistry* **2021**, 352, 129396.
